# Supplementary material for: Estimates of mass absorption cross sections of black carbon for filter-based absorption photometers in the Arctic
Source: Copernicus journal article supplement (doi:10.5194/amt-2021-166), 2021-06-29
Supplement: Supplementary file 1 [file amt-2021-166-supplement.pdf]

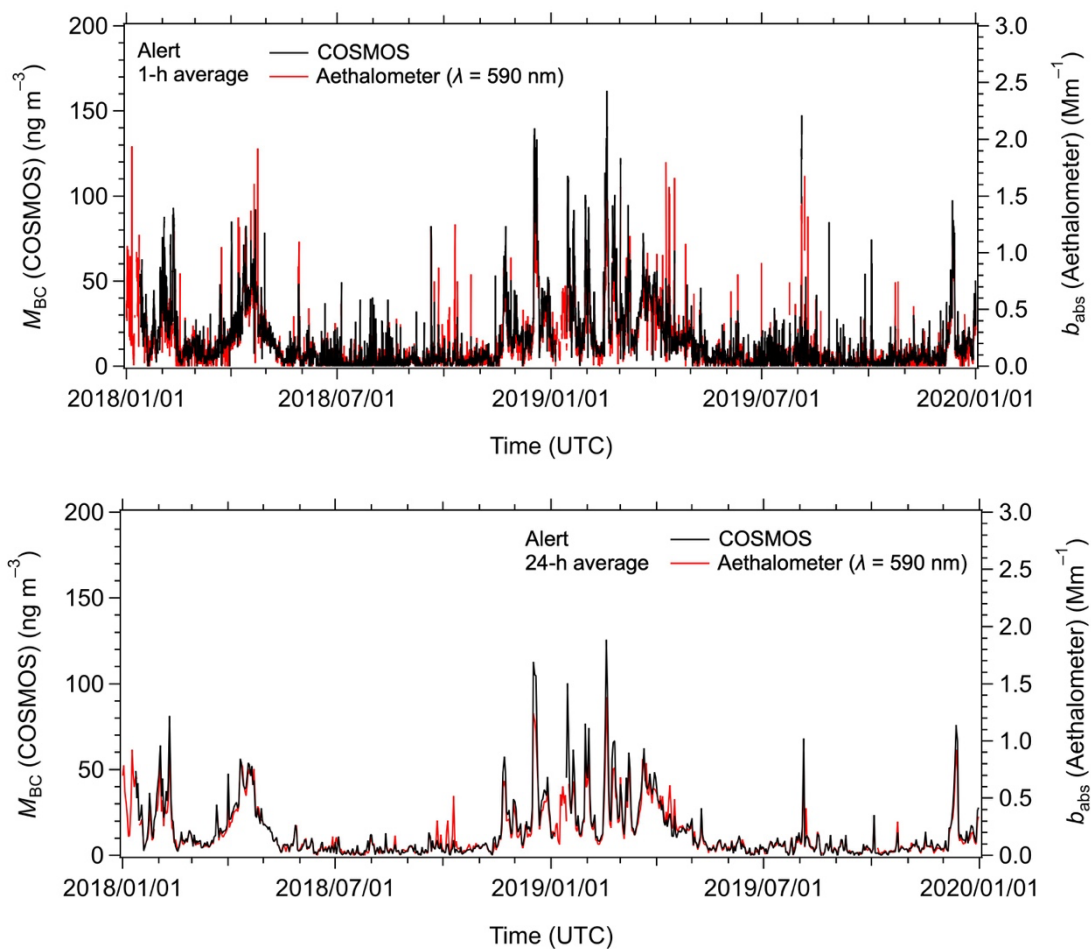

**Figure S1.** Time series of 1-h and 24-h averaged  $M_{BC}$  (COSMOS) and  $b_{abs}$  (Aethalometer;  $\lambda = 590 \text{ nm}$ ) from January 2018 to December 2019 at Alert.

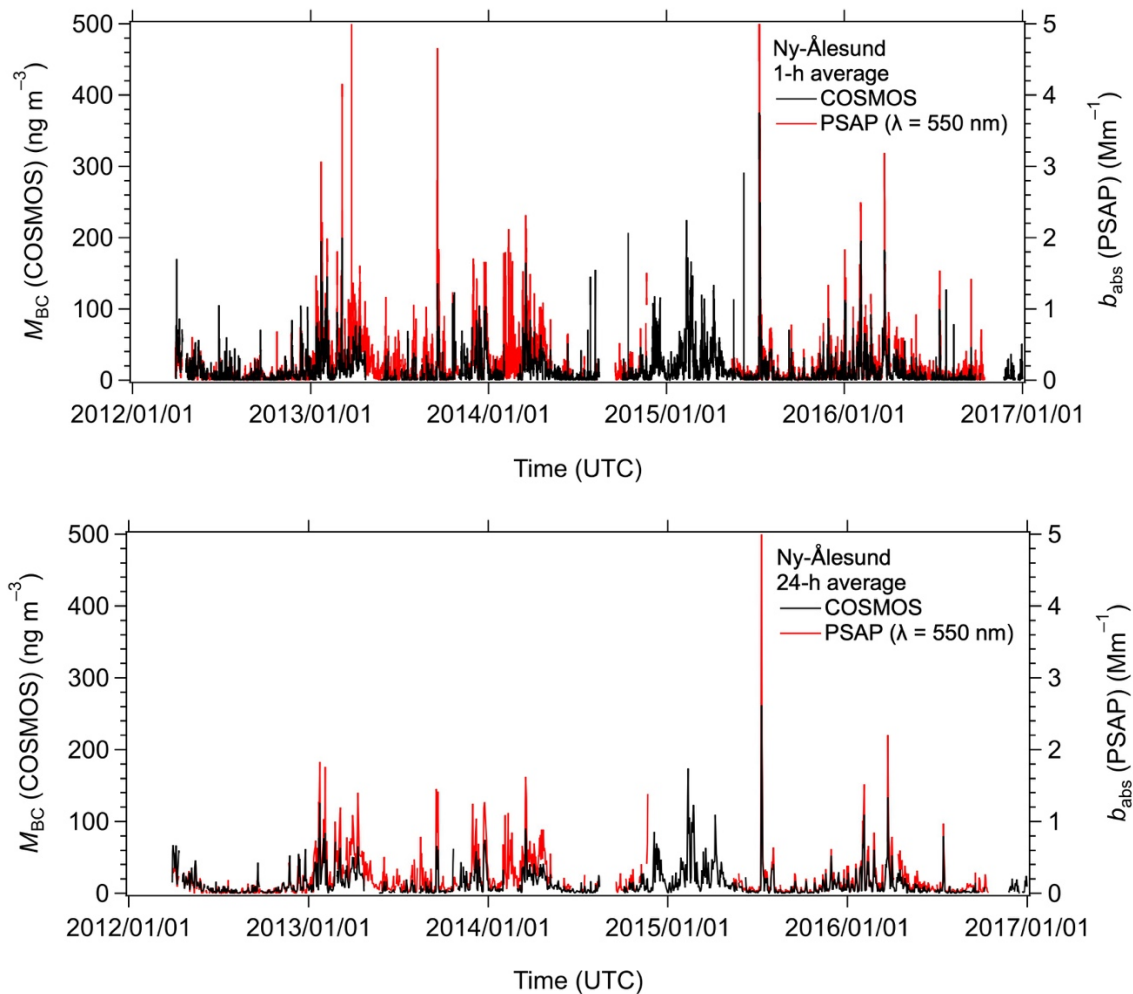

**Figure S2.** Time series of 1-h and 24-h averaged  $M_{BC}$  (COSMOS) and  $b_{abs}$  (PSAP;  $\lambda = 550$  nm) from 10 April 2012 to September 2016 at Ny-Ålesund.

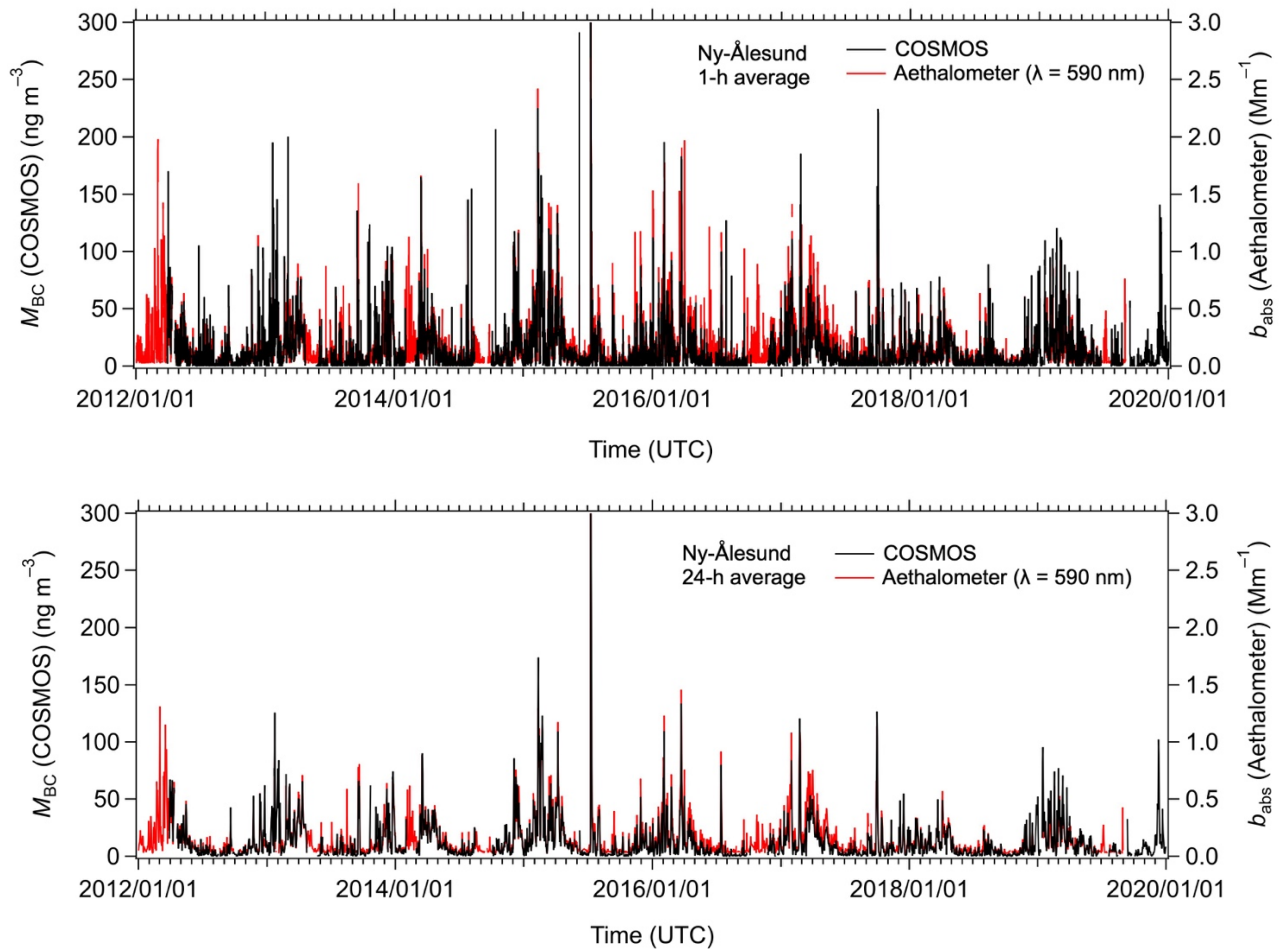

15 **Figure S3.** Time series of 1-h and 24-h averaged  $M_{BC}$  (COSMOS) and  $b_{abs}$  (Aethalometer;  $\lambda = 590 \text{ nm}$ ) from April 2012 to August 2019 at Ny-Ålesund.

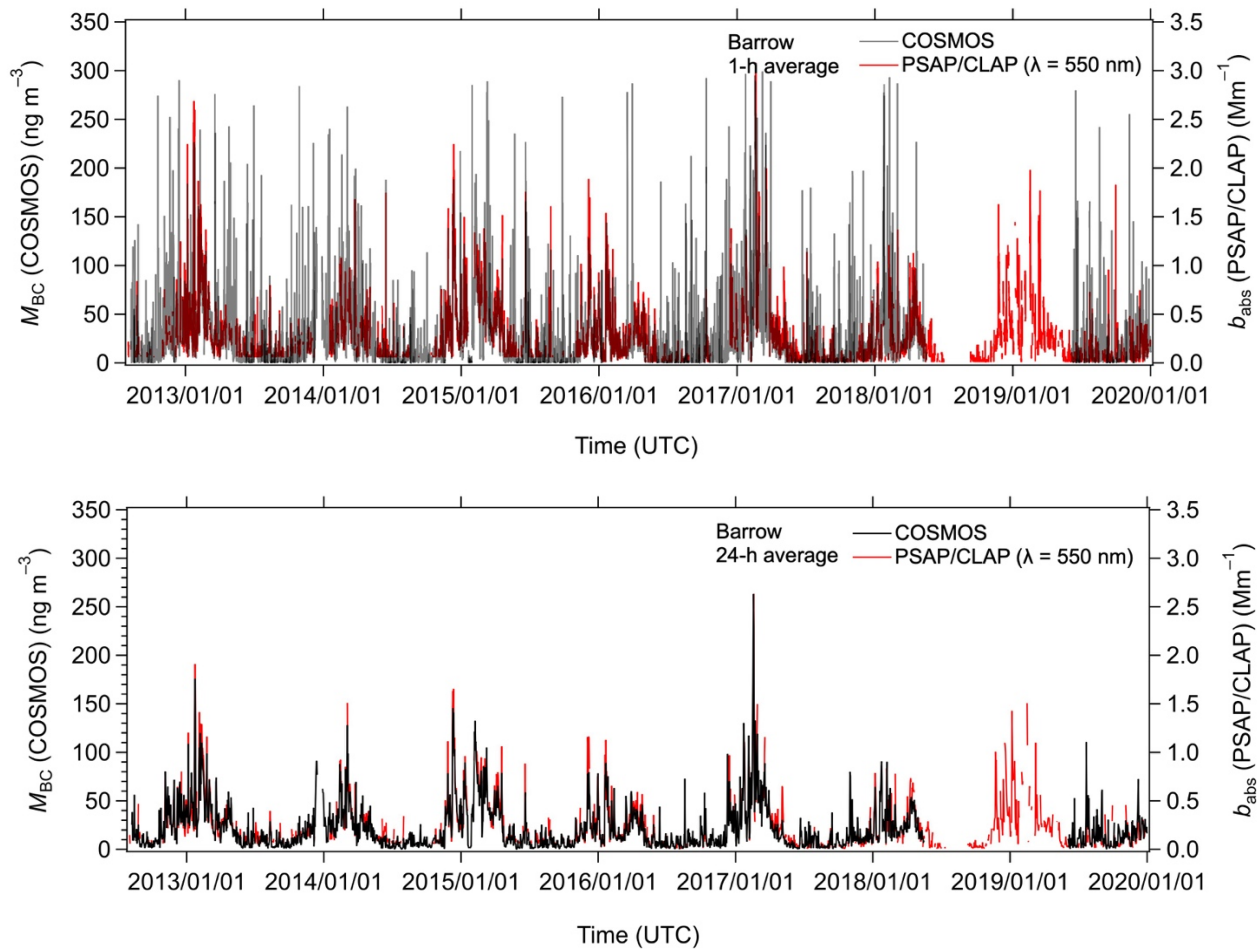

**Figure S4.** Time series of 1-h and 24-h averaged  $M_{BC}$  (COSMOS) and  $b_{abs}$  (PSAP/CLAP;  $\lambda = 550 \text{ nm}$ ) from August 2012 to December 2019 at Barrow.

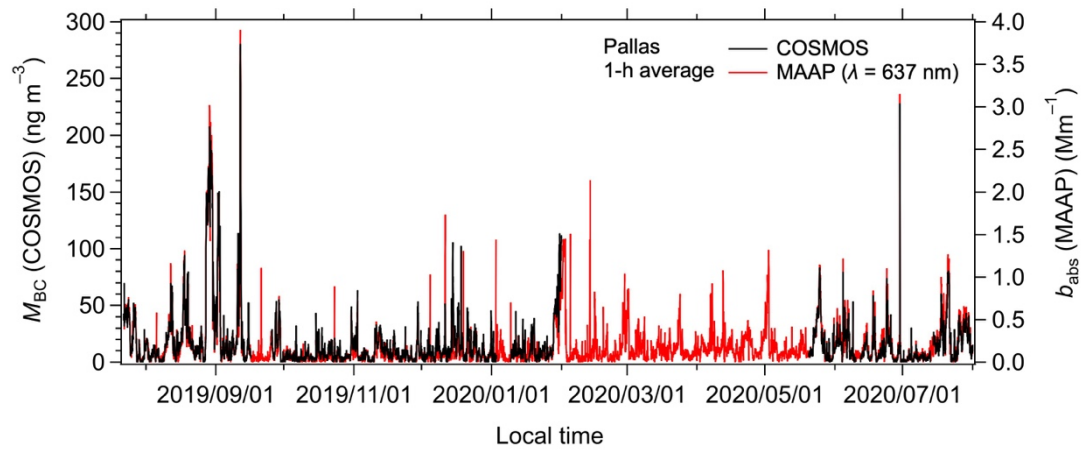

25

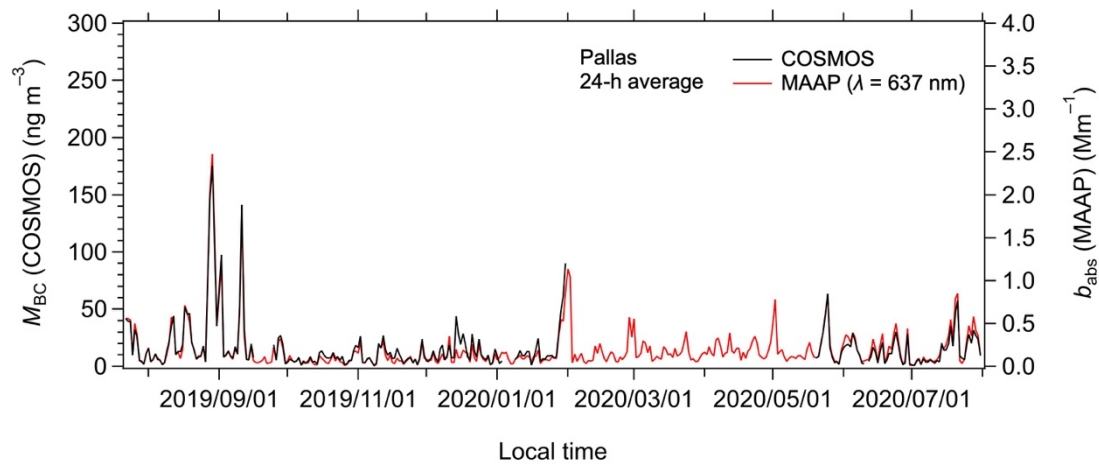

**Figure S5.** Time series of 1-h and 24-h averaged  $M_{BC}$  (COSMOS) and  $b_{abs}$  (MAAP;  $\lambda = 637$  nm) from July 2019 to July 2020 at Pallas.

30

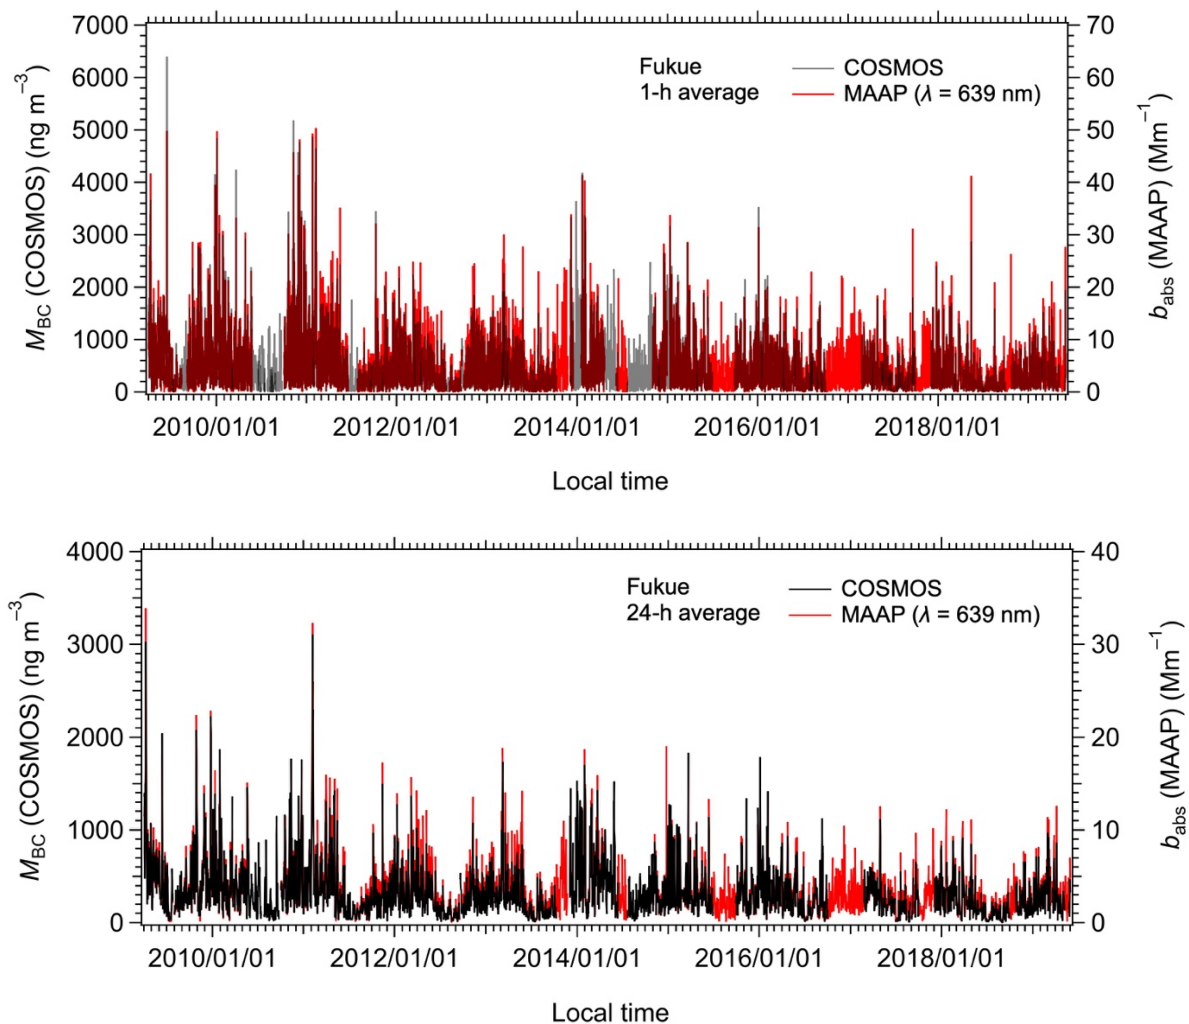

**Figure S6.** Time series of 1-h and 24-h averaged  $M_{BC}$  (COSMOS) and  $b_{abs}$  (MAAP;  $\lambda = 639 \text{ nm}$ ) from April 2009 to May 2019 at Fukue.
